# Supplementary material for: Projected heat stress challenges and abatement opportunities for U.S. milk production
Source: PLOS journal article supplement (doi:10.1371/journal.pone.0214665), 2019-03-28
Supplement: S16 (10.1371/journal.pone.0214665.s016) [file journal.pone.0214665.s016]

# **Estimation of $D_d$ (daily ratio of the number of hours during which Temperature Humidity Index – THI – is above threshold $THI_{thresh}$ – $THI_{thresh}$ –).**

St-Pierre et al. [1] proposed that THI follows a sine distribution throughout the day, where the daily minimum THI is reached at 4:00 and the daily maximum THI is reached at 16:00. We used a sine model approximation to estimate  $D_d$  (1), as suggested by St-Pierre et al.

$$D_d = 0 \text{ for } THI_{thresh} > THI_{max_d}$$

$$D_d = 1 \text{ for } THI_{thresh} < THI_{min_d}$$

ELSE

$$D_d = \frac{\pi - 2 * \arcsin\left(\frac{THI_{thresh} - THI_{mean_d}}{THI_{max_d} - THI_{mean_d}}\right)}{2\pi} \text{ for } THI_{thresh} > THI_{mean_d}$$

$$D_d = \frac{\pi + 2 * \arcsin\left(\frac{THI_{mean_d} - THI_{thresh}}{THI_{max_d} - THI_{mean_d}}\right)}{2\pi} \text{ for } THI_{thresh} < THI_{mean_d}$$
(1)

Where  $THI_{mean_d}$  is the mean of  $THI_{max_d}$  and  $THI_{min_d}$  on day d.

## **Reference**

1. St-Pierre NR, Cobanov B, Schnitkey G. Economic losses from heat stress by US livestock industries. J Dairy Sci. 2003;86: E52–E77.
